# Supplementary material for: Morphological evidence of immunosenescence in Boa constrictor?
Source: Research Square preprint supplement (doi:10.21203/rs.3.rs-6171887/v1), 2025-03-10
Supplement: Supplementary file 1 [file 77f62a1342a59bbd23a0a8bb.docx]

**Supplemental material**

**Table S1**. Animals included into the study, with examined lymphatic organs (spleen (S) and/or thymus (T)) and histological findings. Animal numbers represent individual snakes from the different breeding colonies or private collections (1-15).

1. Animals, sorted by their origin (breeding colonies or private collections 1-15), with sex, age and pathological findings.

| **Animal number** | **Sex** | **Age (years)** | **Pathological findings** |
| --- | --- | --- | --- |
| 1.1 | NK | 0.5 |  |
| 2.1 | M | 1.5 |  |
| 2.2 | F | 1.5 |  |
| 2.3 | F | 1.5 |  |
| 2.4 | F | 1.5 |  |
| 2.5 | F | 1.5 |  |
| 2.6 | F | 1.5 |  |
| 2.7 | M | 1.5 |  |
| 2.8 | M | 1.5 |  |
| 3.1 | F | 4 |  |
| 4.1 | F | 1.5 |  |
| 5.1 | NK | 0.0082 |  |
| 5.2 | F | 3 |  |
| 6.1 | NK | 1 |  |
| 6.2 | NK | 1 |  |
| 6.3 | NK | 1 |  |
| 7.1 | M | 1 |  |
| 7.2 | NK | 1 |  |
| 7.3 | NK | 1 |  |
| 8.1 | F | 4 |  |
| 9.1 | F | 1.5 |  |
| 10.1 | NK | 0.3 |  |
| 10.2 | NK | 0.3 |  |
| 10.3 | NK | 0.3 |  |
| 10.4 | NK | 0.3 |  |
| 10.5 | M | 0.5 |  |
| 10.6 | M | 6 |  |
| 10.7 | M | 20 |  |
| 10.8 | M | 5 | Adipositas |
| 10.9 | F | 6 |  |
| 10.10 | M | 10 |  |
| 10.11 | F | 10 |  |
| 10.12 | M | 8 |  |
| 10.13 | F | 8 |  |
| 10.14 | F | 21 |  |
| 10.16 | F | 10 |  |
| 10.17 | M | 10 |  |
| 10.18 | NK | 0.25 |  |
| 10.19 | F | 10 |  |
| 10.2 | F | 18 |  |
| 11.1 | F | 20 |  |
| 12.1 | M | 11 |  |
| 12.2 | F | 11 |  |
| 12.3 | M | 20 | Bilateral suppurative spectaculitis |
| 13.1 | M | 12 |  |
| 13.2 | F | 12 |  |
| 14.1 | M | 16 | Acute vertebral fracture |
| 15.1 | F | 21 | Mild granulomatous pneumonia |

Legend: NK= not known, F – female, M – male

1. List of animals, sorted by age (in years), with examined lymphatic organs and histological findings.

|  |  |  | **Thymus** | | | | **Spleen** | | | |
| --- | --- | --- | --- | --- | --- | --- | --- | --- | --- | --- |
| **Animal number** | **Age (years)** | **Organs1** | **GC Infa** | **EHª** | **Cb** | **IAb** | **GC Infa** | **SFª** | **IAb** | **CNb** |
| 5.1 | 0.0082 | S | *NE* | *NE* | *NE* | *NE* | + | - | - | + |
| 10.18 | 0.25 | T, S | - | - | + | - | - | - | - | + |
| 10.1 | 0.3 | S | *NE* | *NE* | *NE* | *NE* | - | - | - | - |
| 10.2 | 0.3 | S | *NE* | *NE* | *NE* | *NE* | + | - | - | - |
| 10.3 | 0.3 | T | + | - | - | - | - | - | - | - |
| 10.4 | 0.3 | S | *NE* | *NE* | *NE* | *NE* | + | - | - | + |
| 1.1 | 0.5 | S | *NE* | *NE* | *NE* | *NE* | - | - | - | - |
| 10.5 | 0.5 | T | - | - | - | - | *NE* | *NE* | *NE* | *NE* |
| 6.1 | 1 | T | - | - | - | - | *NE* | *NE* | *NE* | *NE* |
| 6.2 | 1 | T | - | - | - | - | *NE* | *NE* | *NE* | *NE* |
| 6.3 | 1 | S | *NE* | *NE* | *NE* | *NE* | - | - | - | - |
| 7.1 | 1 | T, S | - | - | - | - | - | - | - | - |
| 7.2 | 1 | T, S | - | - | - | - | - | - | - | - |
| 7.3 | 1 | T, S | - | - | - | - | - | - | - | - |
| 2.1 | 1.5 | S | *NE* | *NE* | *NE* | *NE* | + | - | - | - |
| 2.2 | 1.5 | T | + | - | - | - | *NE* | *NE* | *NE* | *NE* |
| 2.3 | 1.5 | T, S | - | - | - | - | +++ | - | - | - |
| 2.4 | 1.5 | T, S | + | - | - | - | + | - | - | - |
| 2.5 | 1.5 | T, S | - | - | - | - | + | - | - | - |
| 2.6 | 1.5 | S | *NE* | *NE* | *NE* | *NE* | + | - | - | - |
| 2.7 | 1.5 | S | *NE* | *NE* | *NE* | *NE* | + | - | - | - |
| 2.8 | 1.5 | T, S | + | - | - | - | + | - | - | - |
| 4.1 | 1.5 | S | *NE* | *NE* | *NE* | *NE* | - | - | - | - |
| 9.1 | 1.5 | T, S | - | - | - | - | - | - | - | - |
| 5.2 | 3 | S | *NE* | *NE* | *NE* | *NE* | + | - | - | + |
| 3.1 | 4 | T, S | ++ | - | - | + | +++ | - | - | - |
| 8.1 | 4 | S | - | - | - | - | ++ | - | - | - |
| 10.8 | 5 | T, S | +++ | + | - | - | + | - | - | + |
| 10.6 | 6 | T, S | ++ | ++ | + | + | - | - | - | - |
| 10.9 | 6 | T | + | + | - | - | *NE* | *NE* | *NE* | *NE* |
| 10.12 | 8 | T, S | - | - | - | - | - | - | - | - |
| 10.13 | 8 | S | *NE* | *NE* | *NE* | *NE* | - | - | - | - |
| 10.10 | 10 | T, S | - | - | - | - | - | - | - | - |
| 10.11 | 10 | T, S | - | ++ | - | - | +++ | ++ | - | - |
| 10.16 | 10 | T, S | +++ | +++ | + | - | +++ | - | - | - |
| 10.17 | 10 | T, S | - | ++ | - | - | - | - | - | - |
| 10.19 | 10 | S | *NE* | *NE* | *NE* | *NE* | ++ | + | - | - |
| 12.1 | 11 | S | *NE* | *NE* | *NE* | *NE* | +++ | + | - | - |
| 12.2 | 11 | S | *NE* | *NE* | *NE* | *NE* | +++ | + | + | - |
| 13.1 | 12 | S | *NE* | *NE* | *NE* | *NE* | +++ | ++ | - | - |
| 13.2 | 12 | S | *NE* | *NE* | *NE* | *NE* | +++ | + | - | - |
| 14.1 | 16 | S | *NE* | *NE* | *NE* | *NE* | +++ | + | - | - |
| 10.20 | 18 | T, S | ++ | ++ | - | - | ++ | - | - | - |
| 10.7 | 20 | T, S | +++ | ++ | - | - | +++ | + | - | - |
| 11.1 | 20 | S | *NE* | *NE* | *NE* | *NE* | +++ | +++ | - | - |
| 12.3 | 20 | S | *NE* | *NE* | *NE* | *NE* | +++ | + | - | - |
| 10.14 | 21 | S | *NE* | *NE* | *NE* | *NE* | +++ | +++ | + | - |
| 15.1 | 21 | S | *NE* | *NE* | *NE* | *NE* | +++ | + | - | - |

Legend: NE= not examined, (-) = not detected. 1This lists whether spleen and/or thymus were examined from the animal. a Corresponds to findings for which a semi-quantitative grading system was applied, in which + = mild, ++=moderate,+=severe. b Corresponds to findings for which their presence was reported, with + = indicating presence and (-) = indicating absence.

S – Spleen; T – Thymus, GC Inf= Granular cell infiltration, EH= Epithelial hyperplasia, C= Cysts, IA=Intracapsular adipocytes, SF=stromal fibrosis, CN= Capsule nodules.

**Supplemental Table 2.** Evaluation of the effect of age on the morphometric parameters and histological findings of the spleen and thymus in *B. constrictor*.

**A.** Comparison of morphometric parameters and histological findings of the spleen and thymus between subadult (<3 years) and adult (≥3 years) *B. constrictor.*

| **Spleen** |  |  |  |  |
| --- | --- | --- | --- | --- |
| **Parameters** | **Subadult (<3 years)** | **Adult (≥3 years)** | **Test parameters** | **Total** |
| (n) Mean* (95%CI) | (n) Mean* (95%CI) | (n) Mean** (95%CI/SD) |
| Cells per µm2² | (19) **0.018** (0.018-0.019) | (21) **0.016** (0.015-0.018) | z = 97, **p = 0.0048** | (41) **0.019** (0.018-0.02) |
| Capsule thickness (µm)¹ª | (18) **44.08** (36.21-51.95) | (21) **177.6** (122.1-224.8) | t = 5.881, df = 37, **p<0.0001** | (39) **61.91** (40.20-134.6) |
| Trabecules thickness (µm)²ª | (17) **51.23** (46.5-65.3) | (21) **230** (167.7-277.3) | z = 16, p**<0.0001** | (38) **98.92** (62.42-198.8) |
| Long axis (µm)¹ | (15) **2880** (2455-3304) | (20) **7372** (6745-8475) | t = 8.309, df = 33, **p<0.0001** | (36) **4876** (3909-5843) |
| Short axis (µm)¹ | (15) **2184** (1676-2693) | (20) 5904 (4837-7446) | t =6.238, df=33, **p<0.0001** | (36) **4310** (2539) |
| Granular cell infiltration² | (11) **1** (1-1) | (17) **3** (3-3) | z=18.5, **p=0.0002** | (28) **2.5** (1-3) |
| **Thymus** |  |  |  |  |
| Cells per µm2² | (11) **0.02** (0.019-0.027) | (8) **0.018** (0.016-0.02) | z = 16. p= **0.0097** | (20) **0.019** (0.018-0.02) |
| Capsule thickness (µm)¹ª | (14) **12.85** (5.519-21.99) | (10) **72.2** (23.19-106.6) | t=4.845. df=22. **p<0.0001** | (24) **21.66** (7.64-35.92) |
| Trabecules thickness (µm)²ª | (13) **9.07** (6.787-12.88) | (10) **32.05** (18.76-44.89) | t = 6.792. df = 21. **p<0.0001** | (23) **19.51** (13.16-25.85) |
| Granular cell infiltration² | (4) **1** (1-1) | (7) **2** (1-3) | z=2 **p=0.0242** | (11) **2** (1-3) |

*The measures of position depend on data distribution: Arithmetic mean (1) for normally distributed data and median (2) for non normal distribution.

**Providing the arithmetic mean and standard deviation (SD) for normally distributed data, and median with Confidence intervals (CI) for non normal distribution. CI=Confidence intervals. ªMeasured in five representative locations across the organ.

**B.** Results of linear regression analysis of the morphometric parameters of the spleen and thymus in relation to age in *B. constrictor.*

| **Spleen** |  |  |  |  |  |
| --- | --- | --- | --- | --- | --- |
| **Parameters** | **F-statistic** | **Standard error** | **R²** | **p-value** | **95% Confidence intervals** |
| Cells per area | 25.31 | 0.00005194 | 0.3935 | **<0.0001** | -0.0003663 to -0.0001562 |
| Capsular thickness (µm) | 151.5 | 1.009 | 0.7994 | **<0.0001** | 10.37 to 14.46 |
| Trabecular thickness (µm) | 113.5 | 1.245 | 0.7542 | **<0.0001** | 10.74 to 15.78 |
| Long axis (µm) | 38.63 | 49.04 | 0.5246 | **<0.0001** | 205.2 to 404.4 |
| Short axis (µm) | 35.4 | 46.29 | 0.5028 | **<0.0001** | 181.4 to 369.4 |
| **Thymus** |  |  |  |  |  |
| **Parameters** | **F-statistic** | **Standard error** | **R²** | **p-value** | **95% Confidence intervals** |
| Cells per area | 3.549 | 0.0001302 | 0.1647 | 0.0758 | -0.0005187 to 2.823e-005 |
| Capsular thickness (µm) | 13.56 | 1.222 | 0.3813 | **0.0013** | 1.966 to 7.034 |
| Trabecular thickness (µm) | 27.22 | 0.3761 | 0.5645 | **<0.0001** | 1.180 to 2.744 |


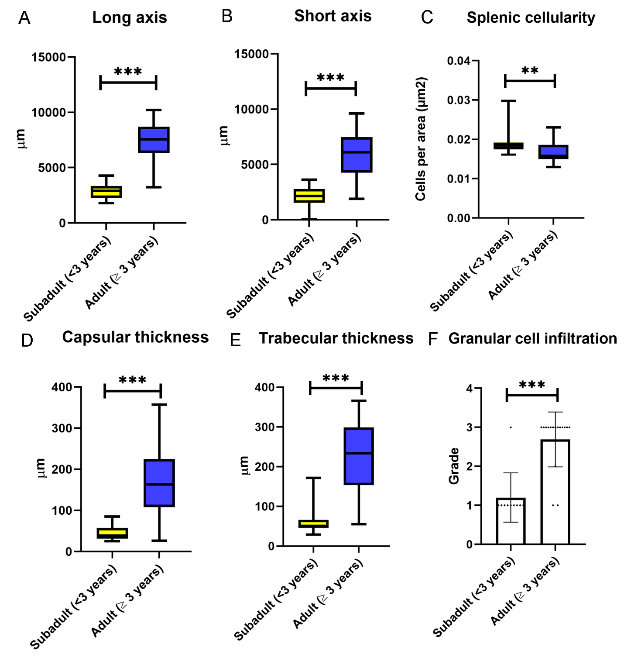


**Supplemental Figure 1.** Age group-related changes in splenic morphometric parameters (organ size, cellularity and framework) and granular cell infiltration of *B. constrictor****.***

**Comparison between the splenic morphometric parameters between** **subadult (<3 years) and adult (≥3 years) *B constrictor***, Box and whisker plots, **p<0.001 and ***p<0.0001. **A & B:** Adult boas show a significant increase in splenic size compared to subadult boas., as indicated by the greater length of the long (A) and short axis (B). **C.** Adult boas show a significant decrease in the number of cells per area (cellularity) compared to subadult boas. **D, E.** Adult boas show a significantly thicker capsule (D) and trabeculae (E). **F.** The spleen of adult boas is infiltrated with a significantly higher number of granular cells.


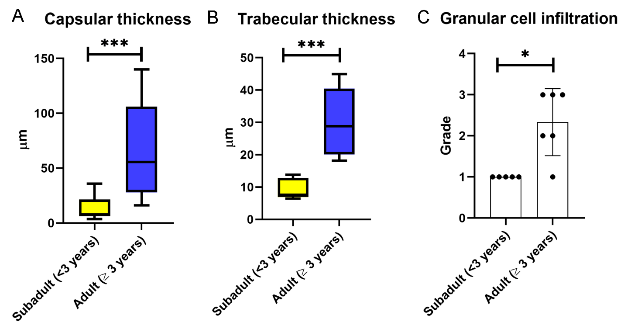


**Supplemental Figure 2.** Age-group related changes in the thymic framework and granular cell infiltration of *B. constrictor.*

**Comparison between the thymic capsular and trabecular thickness and granular cell infiltration between subadult (<3 years) and adult (≥3 years) *B constrictor*,** Box and whisker plots, *p<0.05,***p<0.001. **A, B**. Adult boas show a significantly thicker capsule (A) and trabeculae (B). **C.** The thymus of adult boas shows significantly more intense granular cell infiltration.
